# Supplementary material for: Metformin Treatment or PRODH/POX-Knock out Similarly Induces Apoptosis by Reprograming of Amino Acid Metabolism, TCA, Urea Cycle and Pentose Phosphate Pathway in MCF-7 Breast Cancer Cells
Source: MDPI journal article supplement (doi:10.3390/biom11121888), 2021-12-15
Supplement: s1 [file s1]

## Metformin treatment or PRODH/POX-knock out similarly induces apoptosis by reprogramming of amino acid metabolism, TCA, Urea cycle and pentose phosphate pathway in MCF-7 breast cancer cells.

Thi Yen Ly Huynh<sup>1</sup>, Ilona Oscilowska<sup>2</sup>, Jorge Sáiz<sup>3</sup>, Magdalena Nizioł<sup>2</sup>, Weronika Baszanowska<sup>1</sup>, Coral Barbas<sup>3</sup>, and Jerzy Palka<sup>1,\*</sup>

<sup>1</sup> Department of Medicinal Chemistry, Faculty of Pharmacy, Medical University of Białystok, 15-089, Białystok, Poland; ly.huynhthien@umb.edu.pl (TYLH); w.baszanowska22@wp.pl (WB); pal@umb.edu.pl (JP).

<sup>2</sup> Department of Pharmaceutical and Biopharmaceutical Analysis, Faculty of Pharmacy, Medical University of Białystok, 15-089, Białystok, Poland; ilona.zareba@gmail.com (IO), Magdalena.niziol@umb.edu.pl (M.N.)

<sup>3</sup> Centre for Metabolomics and Bioanalysis (CEMBIO), University CEU San Pablo, 28003 Madrid, Spain; jorge.saizgalindo@ceu.es (JS); cbarbas@ceu.es (CB).

\* Correspondence: Department of Medicinal Chemistry, Faculty of Pharmacy, Medical University of Białystok, 15-089, Białystok, Poland. Phone number: +48 85748 5706. E-mail: pal@umb.edu.pl (JP).

### Supplementary Material

#### 1. Calculation of percentage of change (%)

Due to zero value of several metabolites, the percentage of change (%) were calculated in different ways to avoid the non-valid % change.

- In Group B vs group G, (%) change was calculated by:

$$\text{Change (\%)} = \frac{[(\text{average of metabolite concentration in MCF-7}^{\text{WT}} \text{ cells group} - \text{average of metabolite concentration in MCF-7}^{\text{crPOX}} \text{ cells group})]}{[\text{average of metabolite concentration in MCF-7}^{\text{crPOX}} \text{ cells group}]} \times 100$$

- In group D vs group I and group E vs group J, (%) change was calculated by:

$$\text{Change (\%)} = \frac{[(\text{average of metabolite concentration in MCF-7}^{\text{crPOX}} \text{ cells group} - \text{average of metabolite concentration in MCF-7}^{\text{WT}} \text{ cells group})]}{[\text{average of metabolite concentration in MCF-7}^{\text{WT}} \text{ cells}]} \times 100$$

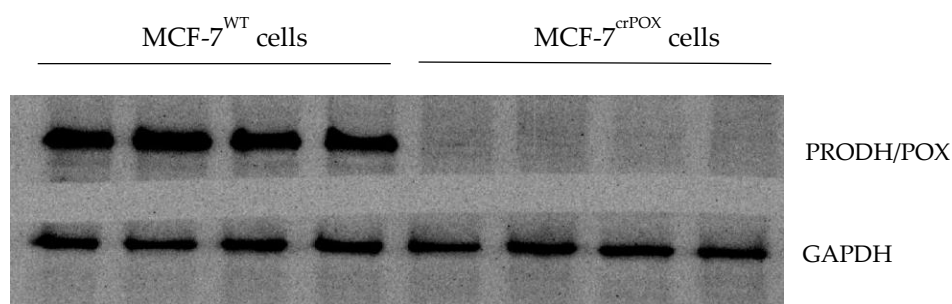

**Figure S1.** The PRODH/POX expression in MCF-7<sup>WT</sup> cells and MCF-7<sup>crPOX</sup> cells by Western Blot using Anti-PRODH/POX antibody (Santa Cruz).

## 2. Cell cycle phases

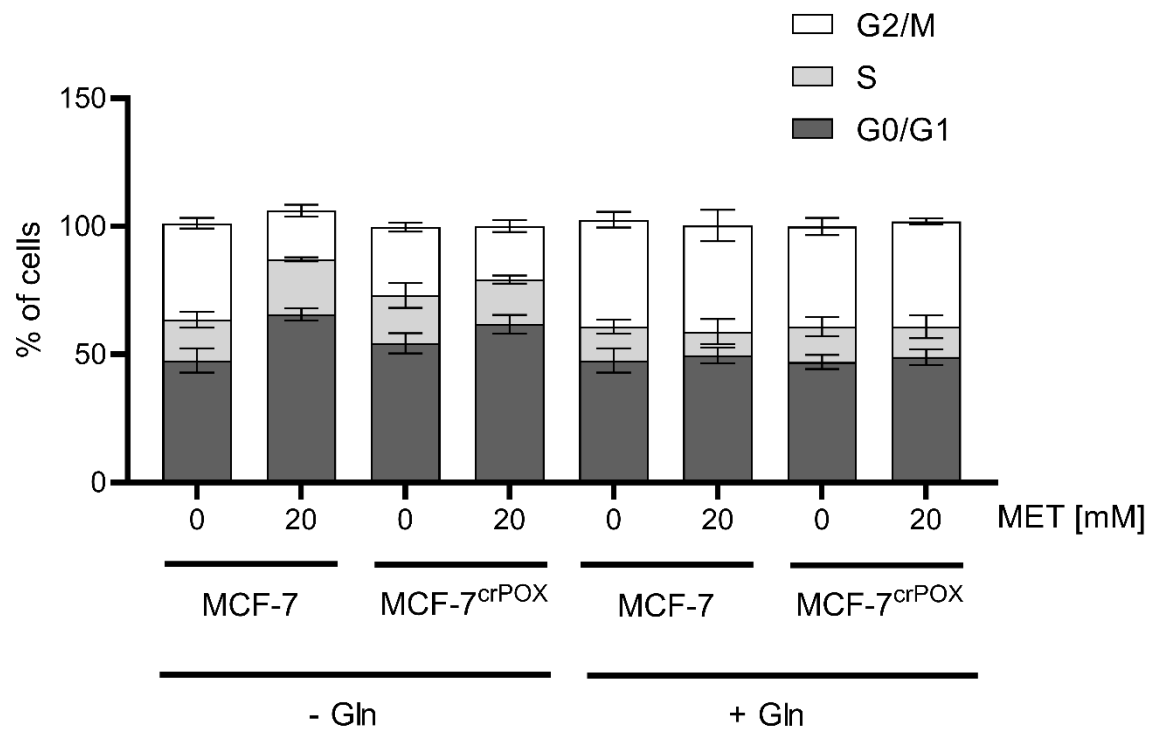

**Figure S2.** The percentage of cells in G0/G1, S and G2/M phases of the cell cycle of MCF-7 and MCF-7<sup>crPOX</sup> cells treated with metformin with or without glutamine (Gln).

### 3. Expression of AMPPK

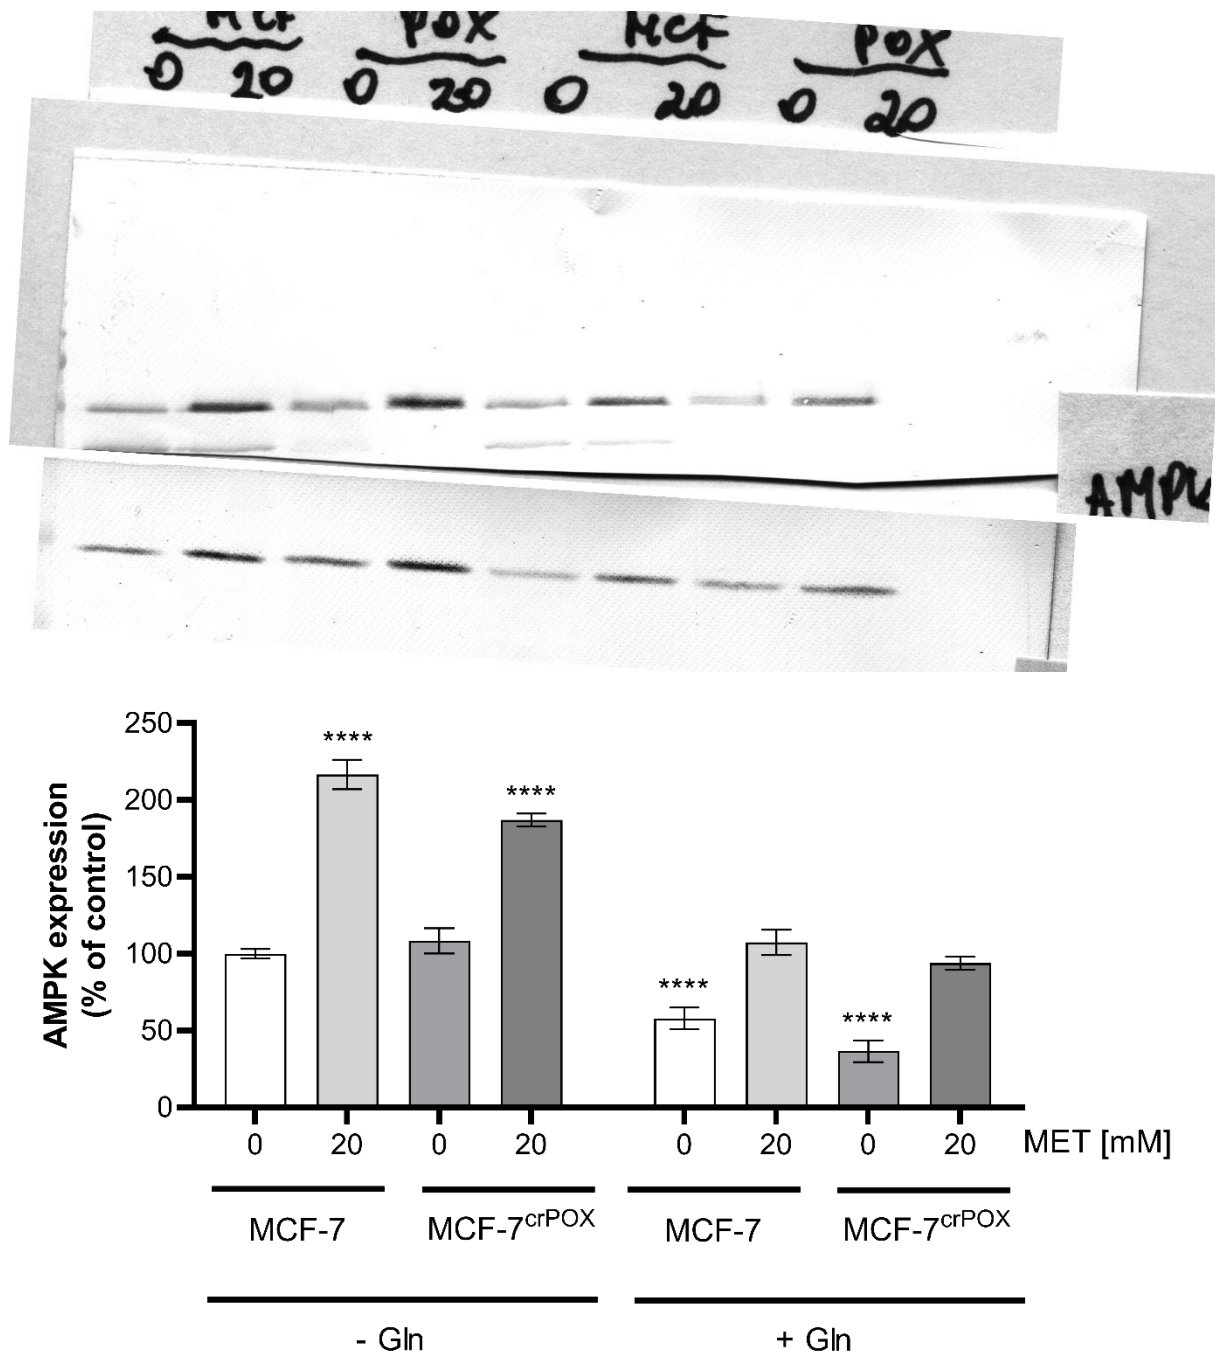

**Figure S3.** The representatives' blots of AMPK expressions in MCF-7 cells and MCF-7<sup>crPOX</sup> cells treated with metformin (MET) cultured in DMEM in the presence and absence of glutamine. GAPDH expression was used as a loading control. The WB bands intensity of representative gels was quantified by densitometry and normalized to GAPDH. The densitometry values represent the mean (% of control)  $\pm$  SD of three experiments, \*P < 0.001.

#### 4. Expression of PRODH/POX

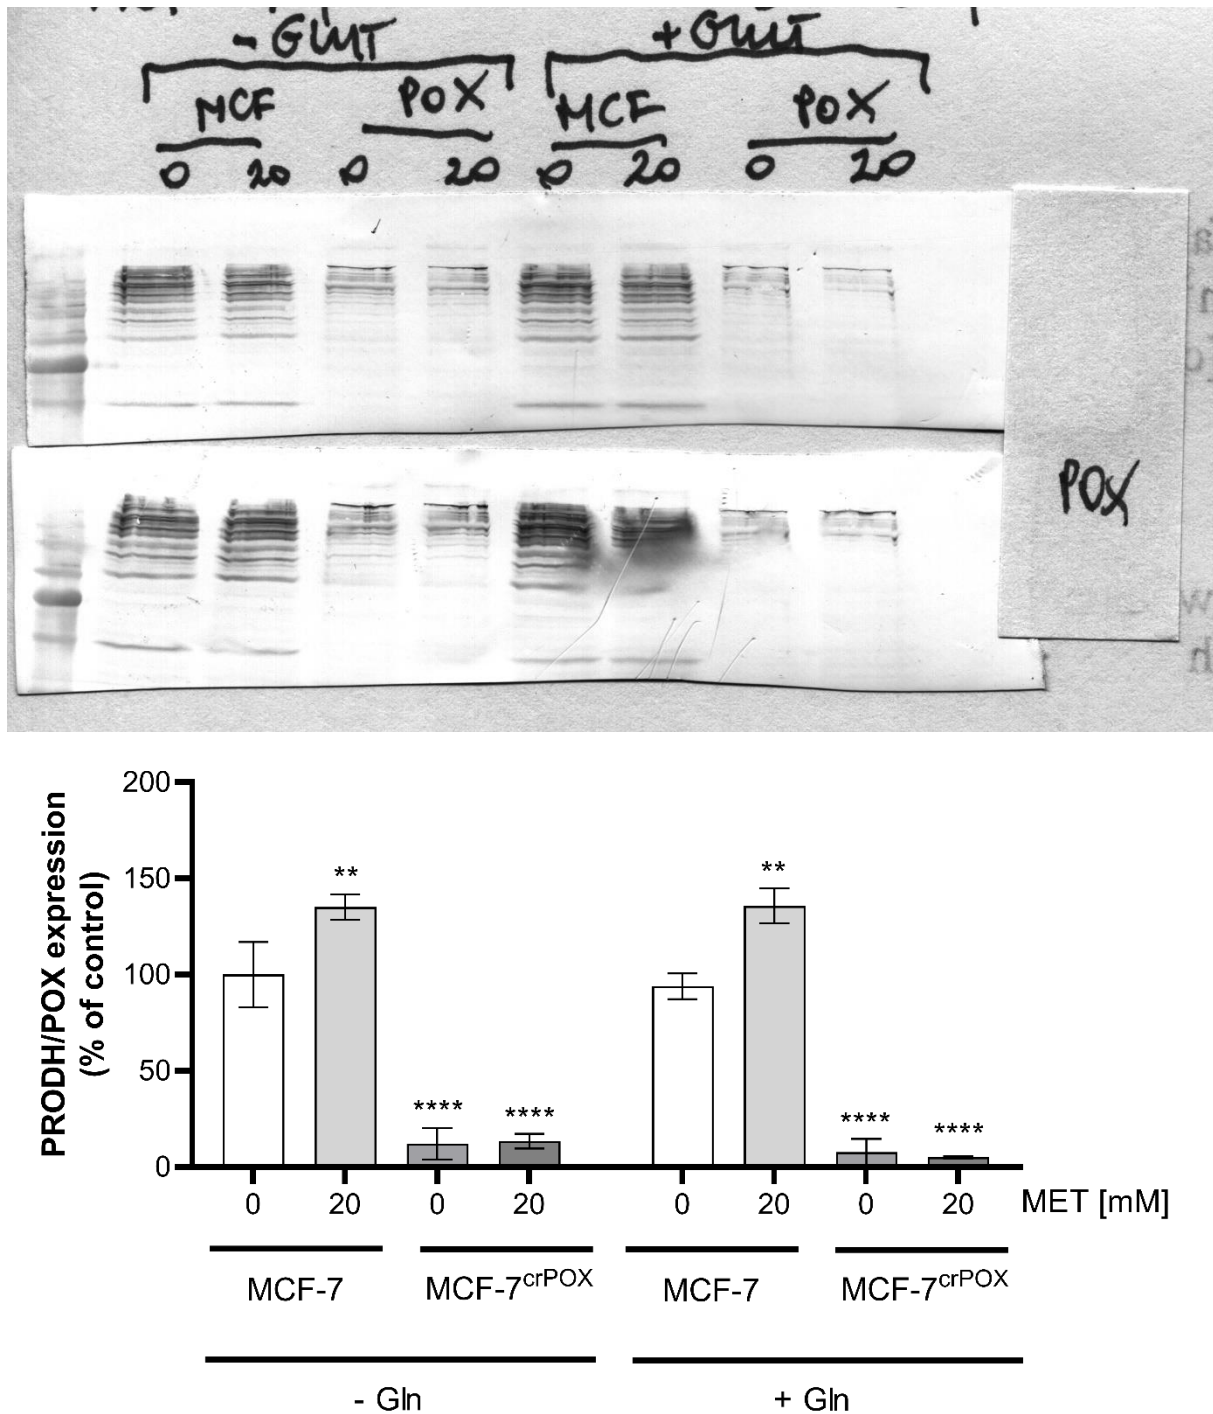

**Figure S4.** The representatives' blots of PRODH/POX expressions in MCF-7 cells and MCF-7<sup>crPOX</sup> cells treated with metformin (MET) cultured in DMEM in the presence and absence of glutamine. GAPDH expression was used as a loading control. The WB bands intensity of representative gels was quantified by densitometry and normalized to GAPDH. The densitometry values represent the mean (% of control)  $\pm$  SD of three experiments, \*P < 0.001.

## 5. Expression of PARP and cleaved-PARP

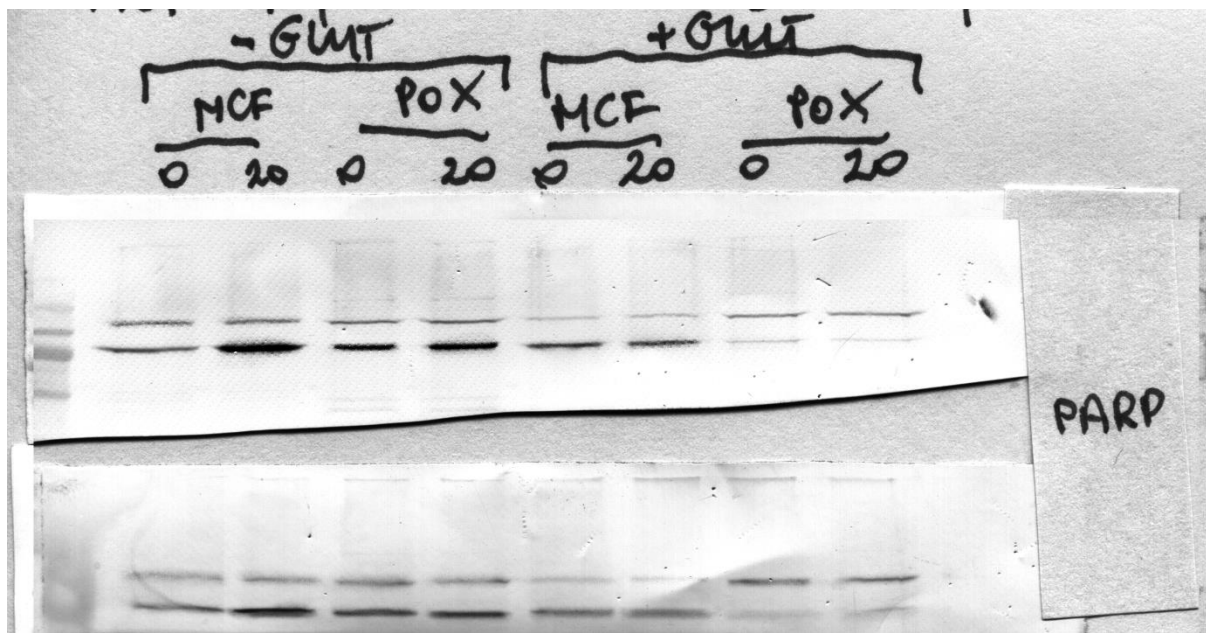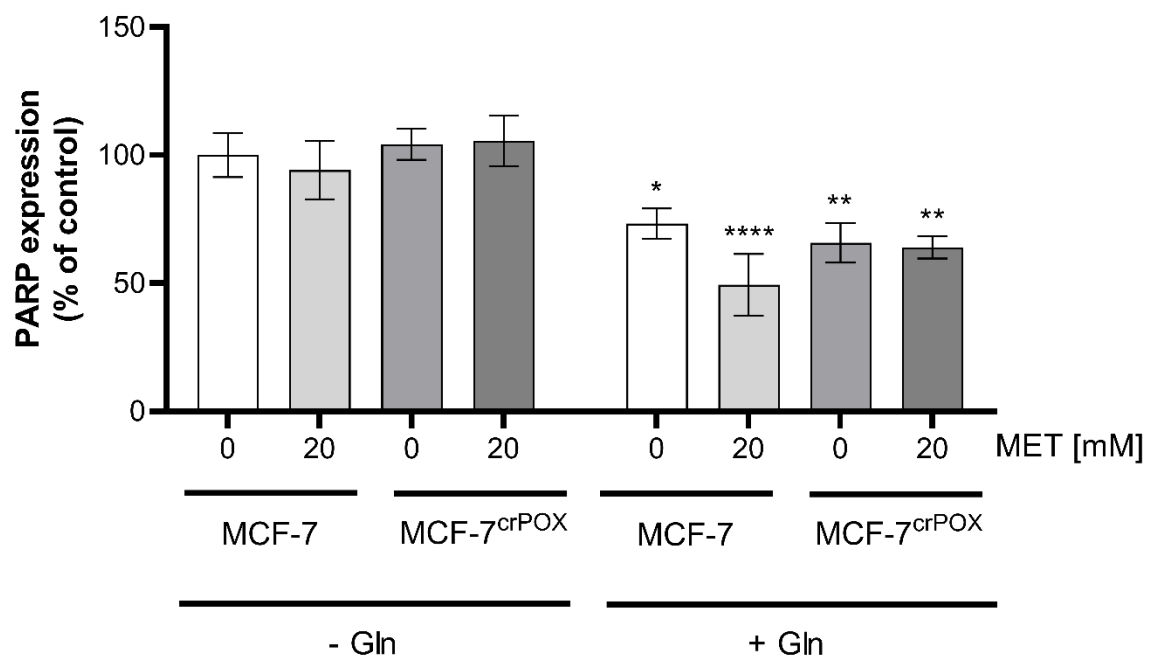

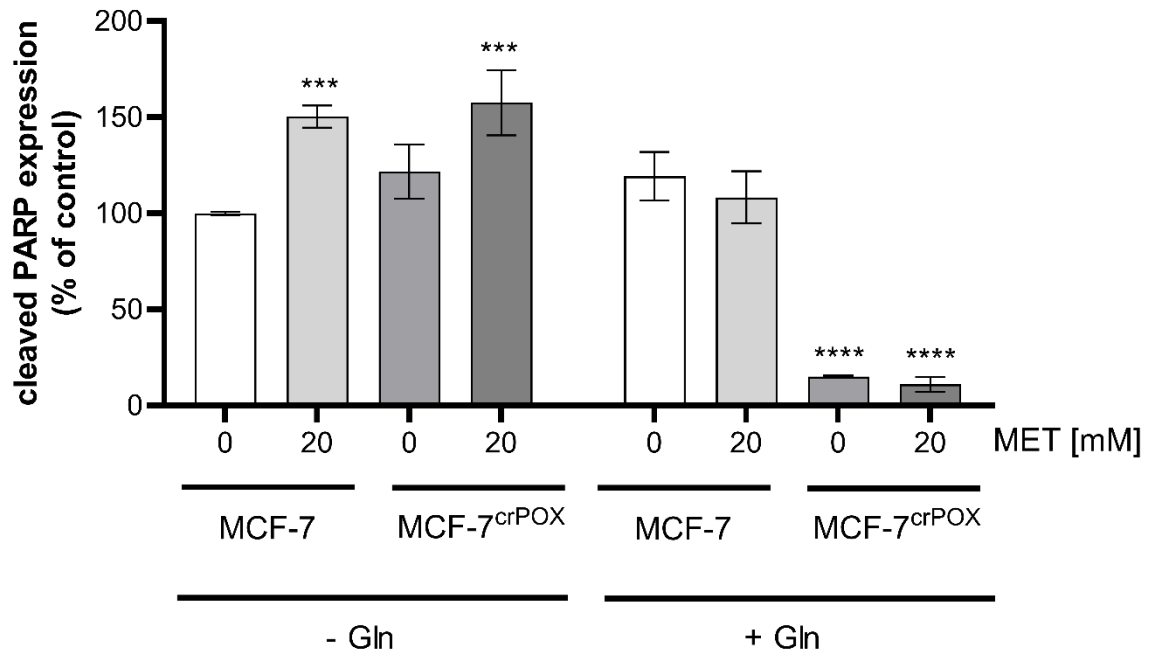

**Figure S5.** The representatives' blots of PARP and cleaved-PARP expressions in MCF-7 cells and MCF-7<sup>crPOX</sup> cells treated with metformin (MET) cultured in DMEM in the presence and absence of glutamine. GAPDH expression was used as a loading control. The WB bands intensity of representative gels was quantified by densitometry and normalized to GAPDH. The densitometry values represent the mean (% of control)  $\pm$  SD of three experiments, \*P < 0.001.

## 6. Expression of Caspase-7

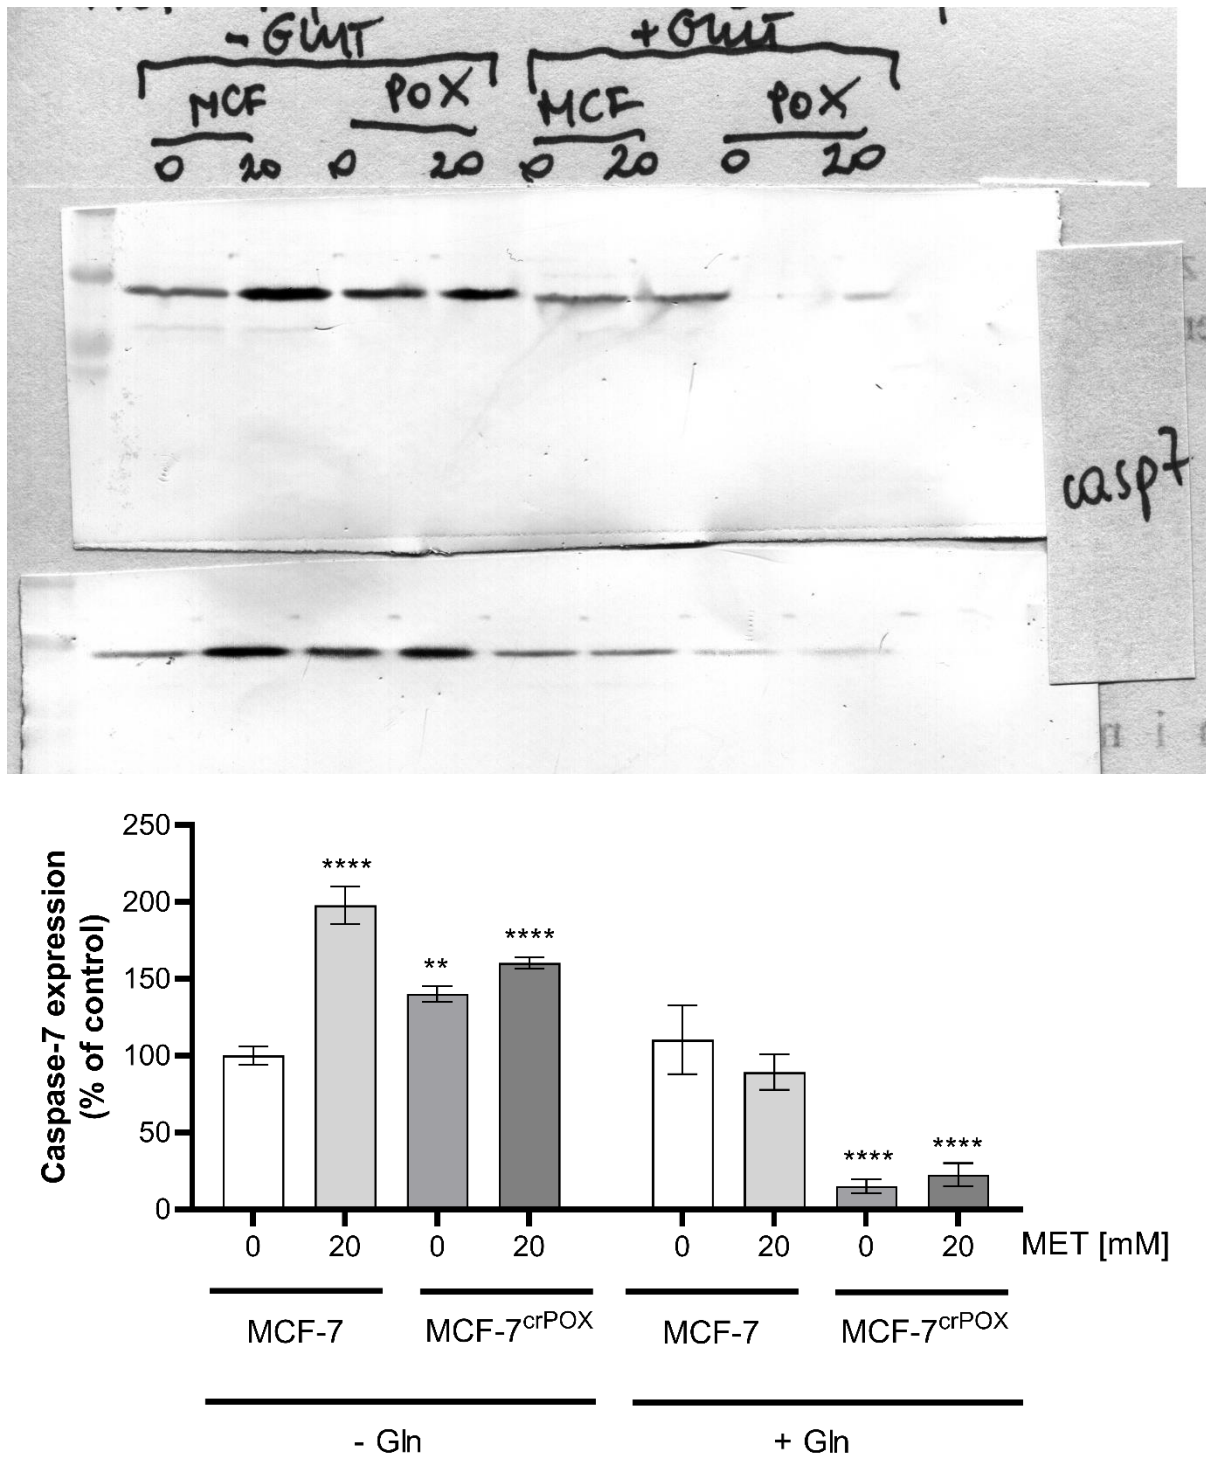

**Figure S6.** The representatives' blots of Caspase-7 expressions in MCF-7 cells and MCF-7<sup>crPOX</sup> cells treated with metformin (MET) cultured in DMEM in the presence and absence of glutamine. GAPDH expression was used as a loading control. The WB bands intensity of representative gels was quantified by densitometry and normalized to GAPDH. The densitometry values represent the mean (% of control)  $\pm$  SD of three experiments, \*P < 0.001.

**Table S1.** Testing samples for MS-based approaches

| No. Samples | Descriptions                                                                                                | Groups |
|-------------|-------------------------------------------------------------------------------------------------------------|--------|
| 1-5         | MCF-7 <sup>WT</sup> cells in DMEM + glutamine, glucose 4g.l <sup>-1</sup> , treated with Metformin 20 mM    | A      |
| 6-10        | MCF-7 <sup>WT</sup> cells in DMEM + glutamine, glucose 4g.l <sup>-1</sup> , untreated                       | B      |
| 11-15       | MCF-7 <sup>WT</sup> cells in DMEM - glutamine, glucose 4g.l <sup>-1</sup> , treated with Metformin 20 mM    | C      |
| 16-20       | MCF-7 <sup>WT</sup> cells in DMEM - glutamine, glucose 4g.l <sup>-1</sup> , untreated                       | D      |
| 21-25       | MCF-7 <sup>WT</sup> cells in DMEM - glutamine, low glucose 1g.l <sup>-1</sup> , untreated                   | E      |
| 26-30       | MCF-7 <sup>crPOX</sup> cells in DMEM + glutamine, glucose 4g.l <sup>-1</sup> , treated with Metformin 20 mM | F      |
| 31-35       | MCF-7 <sup>crPOX</sup> cells in DMEM + glutamine, glucose 4g.l <sup>-1</sup> , untreated                    | G      |
| 36-40       | MCF-7 <sup>crPOX</sup> cells in DMEM - glutamine, glucose 4g.l <sup>-1</sup> , treated with Metformin 20 mM | H      |
| 41-45       | MCF-7 <sup>crPOX</sup> cells in DMEM - glutamine, glucose 4g.l <sup>-1</sup> , untreated                    | I      |
| 46-50       | MCF-7 <sup>crPOX</sup> cells in DMEM - glutamine, low glucose 1g.l <sup>-1</sup> , untreated                | J      |

MCF-7<sup>WT</sup> cells: Wild type MCF-7 cells

MCF-7<sup>crPOX</sup> cells: PROPDH/POX knockout MCF-7 cells

**Table S2.** The summary of testing metabolites

| Relevant metabolic pathways | Metabolites              |
|-----------------------------|--------------------------|
| Glycolysis                  | Glucose                  |
|                             | Phosphoenol-pyruvic acid |
|                             | Pyruvic acid             |
| Pentose phosphate pathway   | Glucose 6-phosphate      |
|                             | 6-phospho-gluconate      |
| Krebs cycle                 | Fumaric acid             |
|                             | Alpha-ketoglutaric acid  |
|                             | Citric acid              |
|                             | Succinic acid            |
|                             | Malic acid               |
|                             | Cis-aconitic acid        |
| Urea cycle                  | Ornithine                |
|                             | Arginine                 |
|                             | Citrulline               |
| Amino acids                 | Proline                  |
|                             | Glutamine                |
|                             | Glutamic acid            |
| Additional metabolites      | Lactic acid              |
|                             | Fructose                 |



**Table S3.** Optimized transition of targeted metabolites

| No. | Metabolites   | Transition  | No. | Metabolites             | Transition   |
|-----|---------------|-------------|-----|-------------------------|--------------|
| 1   | Glucose       | 259 → 79    | 11  | Phosphoenolpyruvate     | 167 → 79     |
| 2   | Fumaric acid  | 115.1 → 71  | 12  | Pyruvic acid            | 87 → 43.2    |
| 3   | Lactic acid   | 89 → 45.3   | 13  | Succinic acid           | 117 → 73.1   |
| 4   | Arginine      | 173.1 → 131 | 14  | 6- phosphogluconic acid | 275.1 → 78.9 |
| 5   | Citrulline    | 174 → 131   | 15  | Alpha ketoglutaric acid | 145 → 101    |
| 6   | Glutamic acid | 146 → 128   | 16  | Cis-aconitic acid       | 173 → 129    |
| 7   | Glutamine     | 145.1 → 127 | 17  | Citric acid             | 191 → 111    |
| 8   | Malic acid    | 133 → 115   | 18  | Fructose                | 179.1 → 59   |
| 9   | Ornithine     | 133 → 133   | 19  | Glucose                 | 179.1 → 59   |
| 10  | Proline       | 114 → 68.1  |     |                         |              |

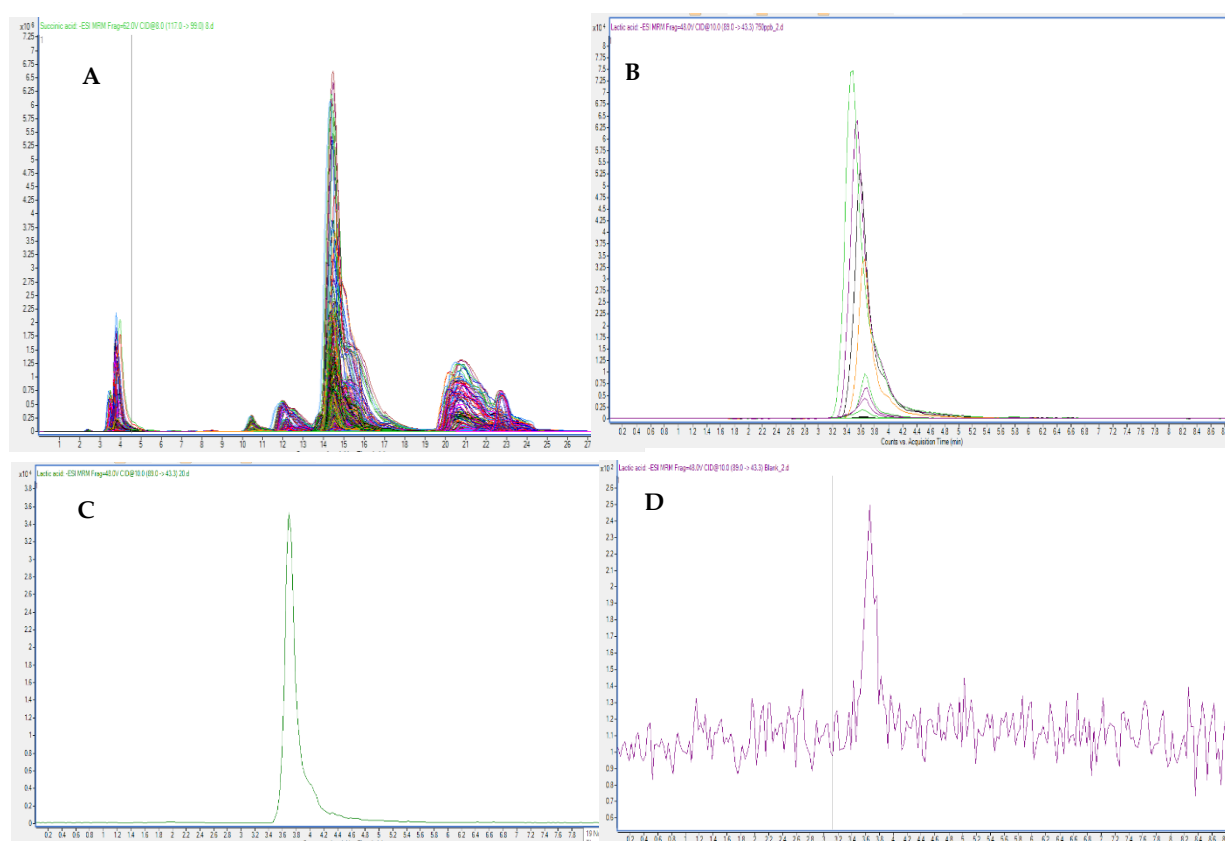

**Figure S7.** Representatives of chromatograms viewed by MassHunter Qualitative analysis navigator post-run LC-QqQ. **A.** All extracted profiles. **B.** The standard curve of Lactic acid. **C.** A testing sample with extracted Lactic acid peak. **D.** Blank.

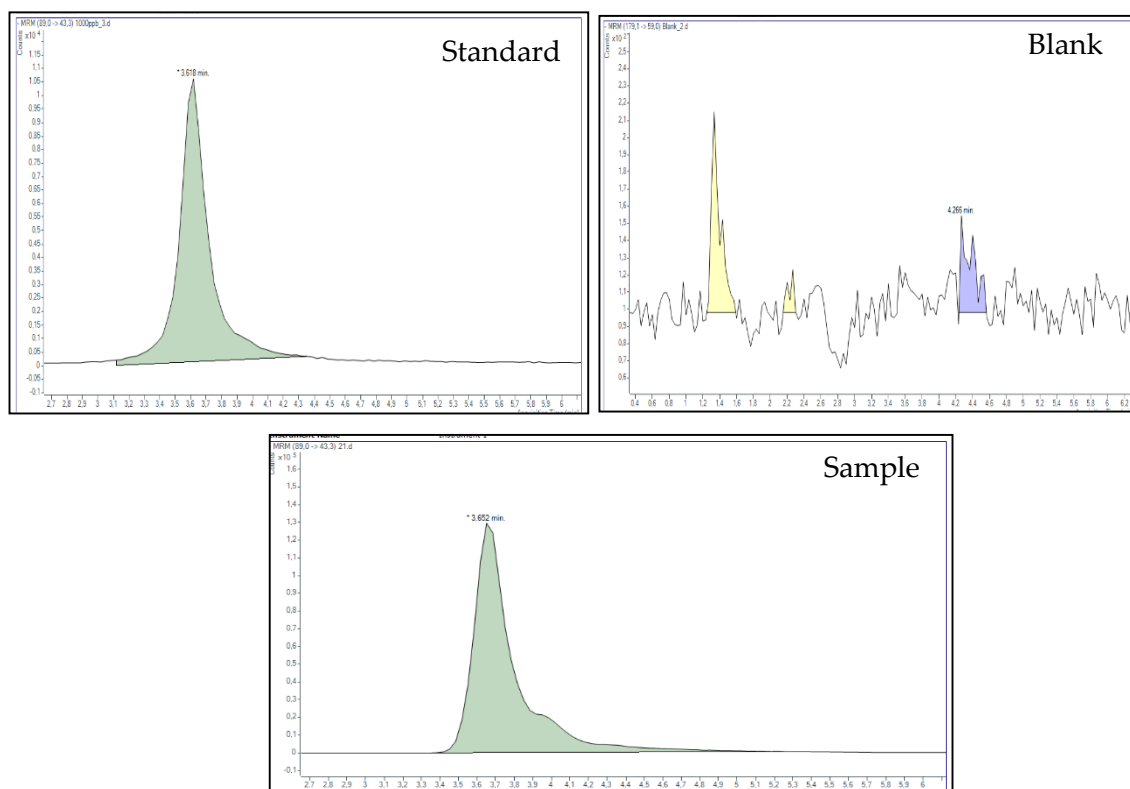

**Figure S8.** The results of lactic acid in Masshunter QQQ Quantitative analysis version 8.0 in reference samples (standard), testing sample and blank.
